# Supplementary material
Source: PubMed Central journal article supplement (PMC6695304)

# Stromal Tumor-infiltrating Lymphocytes in NRG Oncology/NSABP B-31 Adjuvant Trial for Early-stage HER2-positive Breast Cancer

Rim S. Kim, Nan Song, Patrick G. Gavin, et al.

| <b>Table of Contents</b>                                                                                                                                                                 | <b>Page</b> |
|------------------------------------------------------------------------------------------------------------------------------------------------------------------------------------------|-------------|
| <b>Supplementary Table 1.</b><br>Multivariate survival analyses assessment of sTILs as semi-continuous variables<br>in NSABP B-31 .....                                                  | <b>2</b>    |
| <b>Supplementary Table 2.</b><br>Multivariate survival analyses for the combined treatment arms with dichotomized<br>sTILs in NSABP B-31 .....                                           | <b>3</b>    |
| <b>Supplementary Table 3.</b><br>Distribution of sTILs scores with other pathological variables, single-nucleotide<br>polymorphism, mutation, subtype, or signatures in NSABP B-31 ..... | <b>5</b>    |
| <b>Supplementary Table 4.</b><br>Multivariate survival analyses with clinicopathological and molecular variables in<br>NSABP B-31 .....                                                  | <b>9</b>    |
| <b>Supplemental Figure 1.</b><br>Remark Diagram: NSABP B-31 sTILs .....                                                                                                                  | <b>10</b>   |

**Supplementary Table 1.** Multivariate survival analyses assessment of sTILs as semi-continuous variable in NSABP B-31

|                                 |                | HR   | LB   | UB   | p-value |
|---------------------------------|----------------|------|------|------|---------|
| sTILs (semi-continuous)         | sTILs          | 0.42 | 0.27 | 0.64 | <0.001  |
| Treatment (reference: ACT)      | ACTH           | 0.53 | 0.44 | 0.62 | <0.001  |
| ER (reference: negative)        | ER positive    | 0.77 | 0.65 | 0.91 | 0.003   |
| Node (reference: node 1-3)      | Node 4-9       | 1.35 | 1.11 | 1.64 | 0.003   |
|                                 | Node $\geq$ 10 | 2.34 | 1.86 | 2.95 | <0.001  |
| Size (reference: size $\leq$ 2) | Size 2-5       | 1.33 | 1.10 | 1.61 | 0.003   |
|                                 | Size >5        | 1.51 | 1.12 | 2.03 | 0.006   |

Semi-continuous refers to assigning the % of sTILs at 0%, 5%, 10 %, 20%, 30%, etc., as seen in Supplementary Table 3.

**Supplementary Table 2.** Multivariate survival analyses for the combined treatment arms with dichotomized sTILs in NSABP B-31

|                                  |                | HR   | LB   | UB   | p-value   |
|----------------------------------|----------------|------|------|------|-----------|
| sTILs (reference: $\leq 50$ )    | sTILs $> 50$   | 0.65 | 0.49 | 0.86 | 0.003     |
| Treatment (reference: ACT)       | ACTH           | 0.53 | 0.44 | 0.63 | $< 0.001$ |
| ER (reference: negative)         | ER positive    | 0.80 | 0.68 | 0.95 | 0.012     |
| Node (reference: node 1-3)       | Node 4-9       | 1.34 | 1.10 | 1.62 | 0.004     |
|                                  | Node $\geq 10$ | 2.29 | 1.82 | 2.89 | $< 0.001$ |
| Size (reference: size $\leq 2$ ) | Size 2-5       | 1.33 | 1.10 | 1.61 | 0.003     |
|                                  | Size $> 5$     | 1.54 | 1.15 | 2.07 | 0.004     |

**Supplementary Table 3.** Distribution of sTILs scores with other pathological variables, single-nucleotide polymorphism, mutation, subtype, or signatures in NSABP B-31

| sTILs Scores     |                 |                 |                 |                |                 |                 |                |                |                 |                |                 |         |
|------------------|-----------------|-----------------|-----------------|----------------|-----------------|-----------------|----------------|----------------|-----------------|----------------|-----------------|---------|
|                  | 0               | 5%              | 10%             | 20%            | 30%             | 40%             | 50%            | 60%            | 70%             | 80%            | 90%             | P-value |
| <b>Variables</b> |                 |                 |                 |                |                 |                 |                |                |                 |                |                 |         |
| <b>Treatment</b> |                 |                 |                 |                |                 |                 |                |                |                 |                |                 |         |
| ACT              | 36<br>(48%)     | 121<br>(47.5%)  | 217<br>(52%)    | 84<br>(41.8%)  | 105<br>(50.7%)  | 63<br>(56.8%)   | 48<br>(52.7%)  | 38<br>(46.9%)  | 48<br>(51.1%)   | 18<br>(43.9%)  | 2<br>(25%)      | 0.998   |
| ACTH             | 39<br>(52%)     | 134<br>(52.5%)  | 200<br>(48%)    | 117<br>(58.2%) | 102<br>(49.3%)  | 48<br>(43.2%)   | 43<br>(47.3%)  | 43<br>(53.1%)  | 46<br>(48.9%)   | 23<br>(56.1%)  | 6<br>(75%)      |         |
| <b>Age</b>       |                 |                 |                 |                |                 |                 |                |                |                 |                |                 |         |
| Mean(SD)         | 50.4<br>(10.7%) | 49.4<br>(10.2%) | 49.1<br>(10.0%) | 49.4<br>(9.4%) | 50.0<br>(10.1%) | 48.6<br>(11.0%) | 50.4<br>(9.8%) | 49.1<br>(9.0%) | 50.9<br>(10.3%) | 51.9<br>(9.1%) | 52.9<br>(10.9%) | 0.10    |
| Median(range)    | 49<br>(27-74)   | 49<br>(28-76)   | 49<br>(27-77)   | 48<br>(26-76)  | 51<br>(26-78)   | 49<br>(26-75)   | 50<br>(31-75)  | 50<br>(32-70)  | 52<br>(33-74)   | 53<br>(33-73)  | 54<br>(37-70)   |         |
| <b>Race</b>      |                 |                 |                 |                |                 |                 |                |                |                 |                |                 |         |
| White            | 69<br>(92%)     | 217<br>(85.1%)  | 365<br>(87.5%)  | 171<br>(85.1%) | 171<br>(82.6%)  | 88<br>(79.3%)   | 69<br>(75.8%)  | 68<br>(84%)    | 73<br>(77.7%)   | 31<br>(75.6%)  | 4<br>(50%)      | <0.001  |
| Others           | 6<br>(8%)       | 38<br>(14.9%)   | 49<br>(11.8%)   | 30<br>(14.9%)  | 36<br>(17.4%)   | 23<br>(20.7%)   | 21<br>(23.1%)  | 12<br>(14.8%)  | 21<br>(22.3%)   | 10<br>(24.4%)  | 4<br>(50%)      |         |
| Unknown          | 0 (0%)          | 0 (0%)          | 3<br>(0.7%)     | 0 (0%)         | 0 (0%)          | 0 (0%)          | 1<br>(1.1%)    | 1<br>(1.2%)    | 0 (0%)          | 0 (0%)         | 0 (0%)          |         |
| <b>Node</b>      |                 |                 |                 |                |                 |                 |                |                |                 |                |                 |         |
| 1-3              | 45<br>(60%)     | 157<br>(61.6%)  | 245<br>(58.8%)  | 106<br>(52.7%) | 105<br>(50.7%)  | 61<br>(55%)     | 44<br>(48.4%)  | 45<br>(55.6%)  | 56<br>(59.6%)   | 20<br>(48.8%)  | 7<br>(87.5%)    | 0.33    |
| 4-9              | 18              | 75              | 123             | 58             | 70              | 32              | 33             | 26             | 33              | 13             | 1               |         |

|                   |               |                |                |                |                |               |               |               |               |               |              |        |
|-------------------|---------------|----------------|----------------|----------------|----------------|---------------|---------------|---------------|---------------|---------------|--------------|--------|
|                   | (24%)         | (29.4%)        | (29.5%)        | (28.9%)        | (33.8%)        | (28.8%)       | (36.3%)       | (32.1%)       | (35.1%)       | (31.7%)       | (12.5%)      |        |
| ≥10               | 12<br>(16%)   | 23<br>(9%)     | 49<br>(11.8%)  | 37<br>(18.4%)  | 32<br>(15.5%)  | 18<br>(16.2%) | 14<br>(15.4%) | 10<br>(12.3%) | 5<br>(5.3%)   | 8<br>(19.5%)  | 0<br>(0%)    |        |
| <b>Tumor size</b> |               |                |                |                |                |               |               |               |               |               |              |        |
| ≤2                | 31<br>(41.3%) | 84<br>(32.9%)  | 162<br>(38.8%) | 64<br>(31.8%)  | 79<br>(38.2%)  | 41<br>(36.9%) | 30<br>(33%)   | 31<br>(38.3%) | 41<br>(43.6%) | 14<br>(34.1%) | 6<br>(75%)   | 0.099  |
| 2-5               | 35<br>(46.7%) | 143<br>(56.1%) | 210<br>(50.4%) | 118<br>(58.7%) | 108<br>(52.2%) | 62<br>(55.9%) | 52<br>(57.1%) | 47<br>(58%)   | 44<br>(46.8%) | 25<br>(61%)   | 2<br>(25%)   |        |
| >5                | 9<br>(12%)    | 28<br>(11%)    | 45<br>(10.8%)  | 19<br>(9.5%)   | 20<br>(9.7%)   | 8<br>(7.2%)   | 9<br>(9.9%)   | 3<br>(3.7%)   | 9<br>(9.6%)   | 2<br>(4.9%)   | 0<br>(0%)    |        |
| <b>ER</b>         |               |                |                |                |                |               |               |               |               |               |              |        |
| Negative          | 27<br>(36%)   | 81<br>(31.8%)  | 162<br>(38.8%) | 81<br>(40.3%)  | 100<br>(48.3%) | 65<br>(58.6%) | 61<br>(67%)   | 48<br>(59.3%) | 68<br>(72.3%) | 30<br>(73.2%) | 6<br>(75%)   | <0.001 |
| Positive          | 48<br>(64%)   | 174<br>(68.2%) | 254<br>(60.9%) | 120<br>(59.7%) | 107<br>(51.7%) | 45<br>(40.5%) | 30<br>(33%)   | 33<br>(40.7%) | 26<br>(27.7%) | 11<br>(26.8%) | 2<br>(25%)   |        |
| Unknown           | 0<br>(0%)     | 0<br>(0%)      | 1<br>(0.2%)    | 0<br>(0%)      | 0<br>(0%)      | 1<br>(0.9%)   | 0<br>(0%)     | 0<br>(0%)     | 0<br>(0%)     | 0<br>(0%)     | 0<br>(0%)    |        |
| <b>HER2 IHC</b>   |               |                |                |                |                |               |               |               |               |               |              |        |
| 0                 | 3<br>(4%)     | 7<br>(2.7%)    | 2<br>(0.5%)    | 4<br>(2%)      | 0<br>(0%)      | 0<br>(0%)     | 3<br>(3.3%)   | 3<br>(3.7%)   | 0<br>(0%)     | 1<br>(2.4%)   | 1<br>(12.5%) | <0.001 |
| 1                 | 8<br>(10.7%)  | 19<br>(7.5%)   | 41<br>(9.8%)   | 10<br>(5%)     | 12<br>(5.8%)   | 4<br>(3.6%)   | 3<br>(3.3%)   | 3<br>(3.7%)   | 4<br>(4.3%)   | 1<br>(2.4%)   | 0<br>(0%)    |        |
| 2                 | 8<br>(10.7%)  | 26<br>(10.2%)  | 33<br>(7.9%)   | 20<br>(10%)    | 17<br>(8.2%)   | 14<br>(12.6%) | 3<br>(3.3%)   | 4<br>(4.9%)   | 3<br>(3.2%)   | 2<br>(4.9%)   | 0<br>(0%)    |        |
| 3                 | 51<br>(68%)   | 189<br>(74.1%) | 330<br>(79.1%) | 160<br>(79.6%) | 173<br>(83.6%) | 86<br>(77.5%) | 74<br>(81.3%) | 65<br>(80.2%) | 82<br>(87.2%) | 36<br>(87.8%) | 6<br>(75%)   |        |
| Unknown           | 5<br>(6.7%)   | 14<br>(5.5%)   | 11<br>(2.6%)   | 7<br>(3.5%)    | 5<br>(2.4%)    | 7<br>(6.3%)   | 8<br>(8.8%)   | 6<br>(7.4%)   | 5<br>(5.3%)   | 1<br>(2.4%)   | 1<br>(12.5%) |        |
| <b>HER2 FISH</b>  |               |                |                |                |                |               |               |               |               |               |              |        |

|                         |               |                |                |                |                |               |               |               |               |               |              |        |
|-------------------------|---------------|----------------|----------------|----------------|----------------|---------------|---------------|---------------|---------------|---------------|--------------|--------|
| 0                       | 15<br>(20%)   | 34<br>(13.3%)  | 56<br>(13.4%)  | 28<br>(13.9%)  | 17<br>(8.2%)   | 8<br>(7.2%)   | 6<br>(6.6%)   | 8<br>(9.9%)   | 5<br>(5.3%)   | 3<br>(7.3%)   | 1<br>(12.5%) | <0.001 |
| 1                       | 56<br>(74.7%) | 208<br>(81.6%) | 350<br>(83.9%) | 166<br>(82.6%) | 186<br>(89.9%) | 96<br>(86.5%) | 77<br>(84.6%) | 67<br>(82.7%) | 84<br>(89.4%) | 37<br>(90.2%) | 6<br>(75%)   |        |
| Unknown                 | 4<br>(5.3%)   | 13<br>(5.1%)   | 11<br>(2.6%)   | 7<br>(3.5%)    | 4<br>(1.9%)    | 7<br>(6.3%)   | 8<br>(8.8%)   | 6<br>(7.4%)   | 5<br>(5.3%)   | 1<br>(2.4%)   | 1<br>(12.5%) |        |
| <b>HER2 Copy Number</b> |               |                |                |                |                |               |               |               |               |               |              |        |
| 0                       | 7<br>(9.3%)   | 10<br>(3.9%)   | 17<br>(4.1%)   | 10<br>(5%)     | 5<br>(2.4%)    | 1<br>(0.9%)   | 3<br>(3.3%)   | 2<br>(2.5%)   | 0<br>(0%)     | 1<br>(2.4%)   | 1<br>(12.5%) | 0.006  |
| 1                       | 8<br>(10.7%)  | 23<br>(9%)     | 38<br>(9.1%)   | 17<br>(8.5%)   | 13<br>(6.3%)   | 7<br>(6.3%)   | 3<br>(3.3%)   | 6<br>(7.4%)   | 5<br>(5.3%)   | 2<br>(4.9%)   | 0<br>(0%)    |        |
| 2                       | 11<br>(14.7%) | 49<br>(19.2%)  | 90<br>(21.6%)  | 35<br>(17.4%)  | 40<br>(19.3%)  | 30<br>(27%)   | 14<br>(15.4%) | 13<br>(16%)   | 13<br>(13.8%) | 9<br>(22%)    | 3<br>(37.5%) |        |
| 3                       | 45<br>(60%)   | 160<br>(62.7%) | 261<br>(62.6%) | 132<br>(65.7%) | 145<br>(70%)   | 66<br>(59.5%) | 63<br>(69.2%) | 54<br>(66.7%) | 71<br>(75.5%) | 28<br>(68.3%) | 3<br>(37.5%) |        |
| Unknown                 | 4<br>(5.3%)   | 13<br>(5.1%)   | 11<br>(2.6%)   | 7<br>(3.5%)    | 4<br>(1.9%)    | 7<br>(6.3%)   | 8<br>(8.8%)   | 6<br>(7.4%)   | 5<br>(5.3%)   | 1<br>(2.4%)   | 1<br>(12.5%) |        |
| <b>FCGR2A</b>           |               |                |                |                |                |               |               |               |               |               |              |        |
| 131 H/H                 | 13<br>(17.3%) | 50<br>(19.6%)  | 71<br>(17%)    | 43<br>(21.4%)  | 37<br>(17.9%)  | 23<br>(20.7%) | 21<br>(23.1%) | 16<br>(19.8%) | 20<br>(21.3%) | 12<br>(29.3%) | 1<br>(12.5%) | 0.37   |
| 131 H/R                 | 32<br>(42.7%) | 89<br>(34.9%)  | 156<br>(37.4%) | 72<br>(35.8%)  | 84<br>(40.6%)  | 41<br>(36.9%) | 34<br>(37.4%) | 32<br>(39.5%) | 37<br>(39.4%) | 15<br>(36.6%) | 2<br>(25%)   |        |
| 131 R/R                 | 11<br>(14.7%) | 49<br>(19.2%)  | 83<br>(19.9%)  | 41<br>(20.4%)  | 35<br>(16.9%)  | 19<br>(17.1%) | 15<br>(16.5%) | 19<br>(23.5%) | 11<br>(11.7%) | 8<br>(19.5%)  | 2<br>(25%)   |        |
| Unknown                 | 19<br>(25.3%) | 67<br>(26.3%)  | 107<br>(25.7%) | 45<br>(22.4%)  | 51<br>(24.6%)  | 28<br>(25.2%) | 21<br>(23.1%) | 14<br>(17.3%) | 26<br>(27.7%) | 6<br>(14.6%)  | 3<br>(37.5%) |        |
| <b>FCGR2A</b>           |               |                |                |                |                |               |               |               |               |               |              |        |
| 131 high                | 43<br>(57.3%) | 138<br>(54.1%) | 239<br>(57.3%) | 113<br>(56.2%) | 119<br>(57.5%) | 60<br>(54.1%) | 49<br>(53.8%) | 51<br>(63%)   | 48<br>(51.1%) | 23<br>(56.1%) | 4<br>(50%)   | 0.22   |

|               |               |                |                |               |               |               |               |               |               |               |              |        |
|---------------|---------------|----------------|----------------|---------------|---------------|---------------|---------------|---------------|---------------|---------------|--------------|--------|
| 131 low       | 13<br>(17.3%) | 50<br>(19.6%)  | 71<br>(17%)    | 43<br>(21.4%) | 37<br>(17.9%) | 23<br>(20.7%) | 21<br>(23.1%) | 16<br>(19.8%) | 20<br>(21.3%) | 12<br>(29.3%) | 1<br>(12.5%) |        |
| Unknown       | 19<br>(25.3%) | 67<br>(26.3%)  | 107<br>(25.7%) | 45<br>(22.4%) | 51<br>(24.6%) | 28<br>(25.2%) | 21<br>(23.1%) | 14<br>(17.3%) | 26<br>(27.7%) | 6<br>(14.6%)  | 3<br>(37.5%) |        |
| <b>FCGR3A</b> |               |                |                |               |               |               |               |               |               |               |              |        |
| 158 F/F       | 29<br>(38.7%) | 71<br>(27.8%)  | 116<br>(27.8%) | 69<br>(34.3%) | 70<br>(33.8%) | 30<br>(27%)   | 30<br>(33%)   | 31<br>(38.3%) | 30<br>(31.9%) | 13<br>(31.7%) | 1<br>(12.5%) | 0.89   |
| 158 F/V       | 18<br>(24%)   | 73<br>(28.6%)  | 129<br>(30.9%) | 53<br>(26.4%) | 54<br>(26.1%) | 32<br>(28.8%) | 26<br>(28.6%) | 31<br>(38.3%) | 25<br>(26.6%) | 11<br>(26.8%) | 1<br>(12.5%) |        |
| 158 V/V       | 3<br>(4%)     | 27<br>(10.6%)  | 37<br>(8.9%)   | 19<br>(9.5%)  | 16<br>(7.7%)  | 11<br>(9.9%)  | 11<br>(12.1%) | 5<br>(6.2%)   | 7<br>(7.4%)   | 4<br>(9.8%)   | 2<br>(25%)   |        |
| Unknown       | 25<br>(33.3%) | 84<br>(32.9%)  | 135<br>(32.4%) | 60<br>(29.9%) | 67<br>(32.4%) | 38<br>(34.2%) | 24<br>(26.4%) | 14<br>(17.3%) | 32<br>(34%)   | 13<br>(31.7%) | 4<br>(50%)   |        |
| <b>FCGR3A</b> |               |                |                |               |               |               |               |               |               |               |              |        |
| High          | 21<br>(28%)   | 100<br>(39.2%) | 166<br>(39.8%) | 72<br>(35.8%) | 70<br>(33.8%) | 43<br>(38.7%) | 37<br>(40.7%) | 36<br>(44.4%) | 32<br>(34%)   | 15<br>(36.6%) | 3<br>(37.5%) | 0.63   |
| Low           | 29<br>(38.7%) | 71<br>(27.8%)  | 116<br>(27.8%) | 69<br>(34.3%) | 70<br>(33.8%) | 30<br>(27%)   | 30<br>(33%)   | 31<br>(38.3%) | 30<br>(31.9%) | 13<br>(31.7%) | 1<br>(12.5%) |        |
| Unknown       | 25<br>(33.3%) | 84<br>(32.9%)  | 135<br>(32.4%) | 60<br>(29.9%) | 67<br>(32.4%) | 38<br>(34.2%) | 24<br>(26.4%) | 14<br>(17.3%) | 32<br>(34%)   | 13<br>(31.7%) | 4<br>(50%)   |        |
| <b>8-gene</b> |               |                |                |               |               |               |               |               |               |               |              |        |
| Low           | 12<br>(16%)   | 30<br>(11.8%)  | 52<br>(12.5%)  | 23<br>(11.4%) | 19<br>(9.2%)  | 6<br>(5.4%)   | 3<br>(3.3%)   | 8<br>(9.9%)   | 6<br>(6.4%)   | 2<br>(4.9%)   | 0<br>(0%)    | <0.001 |
| Med           | 16<br>(21.3%) | 81<br>(31.8%)  | 148<br>(35.5%) | 73<br>(36.3%) | 71<br>(34.3%) | 47<br>(42.3%) | 39<br>(42.9%) | 31<br>(38.3%) | 47<br>(50%)   | 17<br>(41.5%) | 7<br>(87.5%) |        |
| High          | 31<br>(41.3%) | 94<br>(36.9%)  | 156<br>(37.4%) | 78<br>(38.8%) | 87<br>(42%)   | 40<br>(36%)   | 32<br>(35.2%) | 32<br>(39.5%) | 26<br>(27.7%) | 15<br>(36.6%) | 1<br>(12.5%) |        |
| Unknown       | 16<br>(21.3%) | 50<br>(19.6%)  | 61<br>(14.6%)  | 27<br>(13.4%) | 30<br>(14.5%) | 18<br>(16.2%) | 17<br>(18.7%) | 10<br>(12.3%) | 15<br>(16%)   | 7<br>(17.1%)  | 0<br>(0%)    |        |

| <b>Intrinsic subtype</b> |               |                |                |                |                |               |               |               |               |               |              |        |
|--------------------------|---------------|----------------|----------------|----------------|----------------|---------------|---------------|---------------|---------------|---------------|--------------|--------|
| Basal                    | 2<br>(2.7%)   | 8<br>(3.1%)    | 11<br>(2.6%)   | 10<br>(5%)     | 17<br>(8.2%)   | 6<br>(5.4%)   | 6<br>(6.6%)   | 6<br>(7.4%)   | 9<br>(9.6%)   | 3<br>(7.3%)   | 1<br>(12.5%) | <0.001 |
| HER2                     | 25<br>(33.3%) | 84<br>(32.9%)  | 149<br>(35.7%) | 82<br>(40.8%)  | 87<br>(42%)    | 56<br>(50.5%) | 47<br>(51.6%) | 39<br>(48.1%) | 53<br>(56.4%) | 24<br>(58.5%) | 4<br>(50%)   |        |
| Lum A                    | 18<br>(24%)   | 75<br>(29.4%)  | 128<br>(30.7%) | 44<br>(21.9%)  | 45<br>(21.7%)  | 16<br>(14.4%) | 11<br>(12.1%) | 14<br>(17.3%) | 4<br>(4.3%)   | 4<br>(9.8%)   | 1<br>(12.5%) |        |
| Lum B                    | 13<br>(17.3%) | 34<br>(13.3%)  | 52<br>(12.5%)  | 33<br>(16.4%)  | 21<br>(10.1%)  | 11<br>(9.9%)  | 3<br>(3.3%)   | 8<br>(9.9%)   | 9<br>(9.6%)   | 2<br>(4.9%)   | 0<br>(0%)    |        |
| Normal                   | 1<br>(1.3%)   | 4<br>(1.6%)    | 16<br>(3.8%)   | 5<br>(2.5%)    | 7<br>(3.4%)    | 4<br>(3.6%)   | 7<br>(7.7%)   | 4<br>(4.9%)   | 4<br>(4.3%)   | 1<br>(2.4%)   | 2<br>(25%)   |        |
| Unknown                  | 16<br>(21.3%) | 50<br>(19.6%)  | 61<br>(14.6%)  | 27<br>(13.4%)  | 30<br>(14.5%)  | 18<br>(16.2%) | 17<br>(18.7%) | 10<br>(12.3%) | 15<br>(16%)   | 7<br>(17.1%)  | 0<br>(0%)    |        |
| <b>Intrinsic subtype</b> |               |                |                |                |                |               |               |               |               |               |              |        |
| HER2                     | 25<br>(33.3%) | 84<br>(32.9%)  | 149<br>(35.7%) | 82<br>(40.8%)  | 87<br>(42%)    | 56<br>(50.5%) | 47<br>(51.6%) | 39<br>(48.1%) | 53<br>(56.4%) | 24<br>(58.5%) | 4<br>(50%)   | <0.001 |
| Non-HER2                 | 34<br>(45.3%) | 121<br>(47.5%) | 207<br>(49.6%) | 92<br>(45.8%)  | 90<br>(43.5%)  | 37<br>(33.3%) | 27<br>(29.7%) | 32<br>(39.5%) | 26<br>(27.7%) | 10<br>(24.4%) | 4<br>(50%)   |        |
| Unknown                  | 16<br>(21.3%) | 50<br>(19.6%)  | 61<br>(14.6%)  | 27<br>(13.4%)  | 30<br>(14.5%)  | 18<br>(16.2%) | 17<br>(18.7%) | 10<br>(12.3%) | 15<br>(16%)   | 7<br>(17.1%)  | 0<br>(0%)    |        |
| <b>PIK3CA Mutation</b>   |               |                |                |                |                |               |               |               |               |               |              |        |
| WT                       | 26<br>(34.7%) | 69<br>(27.1%)  | 106<br>(25.4%) | 53<br>(26.4%)  | 61<br>(29.5%)  | 31<br>(27.9%) | 32<br>(35.2%) | 23<br>(28.4%) | 23<br>(24.5%) | 15<br>(36.6%) | 2<br>(25%)   | 0.66   |
| MT                       | 4<br>(5.3%)   | 20<br>(7.8%)   | 38<br>(9.1%)   | 24<br>(11.9%)  | 24<br>(11.6%)  | 6<br>(5.4%)   | 11<br>(12.1%) | 9<br>(11.1%)  | 4<br>(4.3%)   | 3<br>(7.3%)   | 1<br>(12.5%) |        |
| Unknown                  | 45<br>(60%)   | 166<br>(65.1%) | 273<br>(65.5%) | 124<br>(61.7%) | 122<br>(58.9%) | 74<br>(66.7%) | 48<br>(52.7%) | 49<br>(60.5%) | 67<br>(71.3%) | 23<br>(56.1%) | 5<br>(62.5%) |        |

Note: Associations of sTILs scores and other variables were analyzed by ANOVA test without including samples with missing values. Study methods and results for molecular variables are as previously described.<sup>13, 17, 21</sup>



**Supplementary Table 4.** Multivariate survival analyses with clinicopathological and molecular variables in NSABP B-31

|                                         |                     | ACT Arm |      |      |         | ACTH Arm |      |      |         |
|-----------------------------------------|---------------------|---------|------|------|---------|----------|------|------|---------|
|                                         |                     | HR      | LB   | UB   | p-value | HR       | LB   | UB   | p-value |
| sTILs<br>(reference: ≤50)               | sTILs >50           | 0.64    | 0.39 | 1.06 | 0.082   | 0.36     | 0.19 | 0.67 | 0.001   |
| ER<br>(reference: negative)             | ER Positive         | 0.94    | 0.62 | 1.43 | 0.777   | 0.71     | 0.44 | 1.13 | 0.145   |
| Node<br>(reference: Node 1-3)           | Node 4-9            | 1.10    | 0.76 | 1.59 | 0.620   | 1.62     | 1.10 | 2.38 | 0.015   |
|                                         | Node ≥10            | 2.57    | 1.67 | 3.95 | <0.001  | 3.00     | 1.87 | 4.81 | <0.001  |
| Size<br>(reference: size ≤2)            | Size 2-5            | 1.29    | 0.91 | 1.83 | 0.149   | 1.50     | 1.01 | 2.23 | 0.043   |
|                                         | Size >5             | 1.92    | 1.08 | 3.40 | 0.026   | 1.48     | 0.81 | 2.68 | 0.201   |
| FCGR3<br>(reference: low)               | FCGR3 high affinity | 1.47    | 1.07 | 2.02 | 0.018   | 0.98     | 0.69 | 1.39 | 0.916   |
| 8-gene<br>(reference: low)              | Med                 | 1.14    | 0.63 | 2.07 | 0.656   | 0.60     | 0.35 | 1.03 | 0.065   |
|                                         | High                | 1.59    | 0.87 | 2.88 | 0.129   | 0.40     | 0.23 | 0.71 | 0.002   |
| Intrinsic subtype<br>(reference: Lum A) | Lum B               | 0.69    | 0.40 | 1.19 | 0.179   | 1.28     | 0.74 | 2.21 | 0.381   |
|                                         | HER2                | 1.07    | 0.67 | 1.72 | 0.779   | 1.18     | 0.69 | 2.02 | 0.535   |
|                                         | Basal               | 1.01    | 0.47 | 2.18 | 0.981   | 1.67     | 0.62 | 4.46 | 0.310   |
|                                         | Normal like         | 0.61    | 0.22 | 1.72 | 0.349   | 0.80     | 0.29 | 2.25 | 0.678   |

Note: Models included all listed variables with the exception of PIK3CA, which was excluded from multivariate analysis, because PIK3CA mutations were profiled only in a subset of B-31.

## Supp Fig 1. NSABP B-31 sTILs Remark Diagram

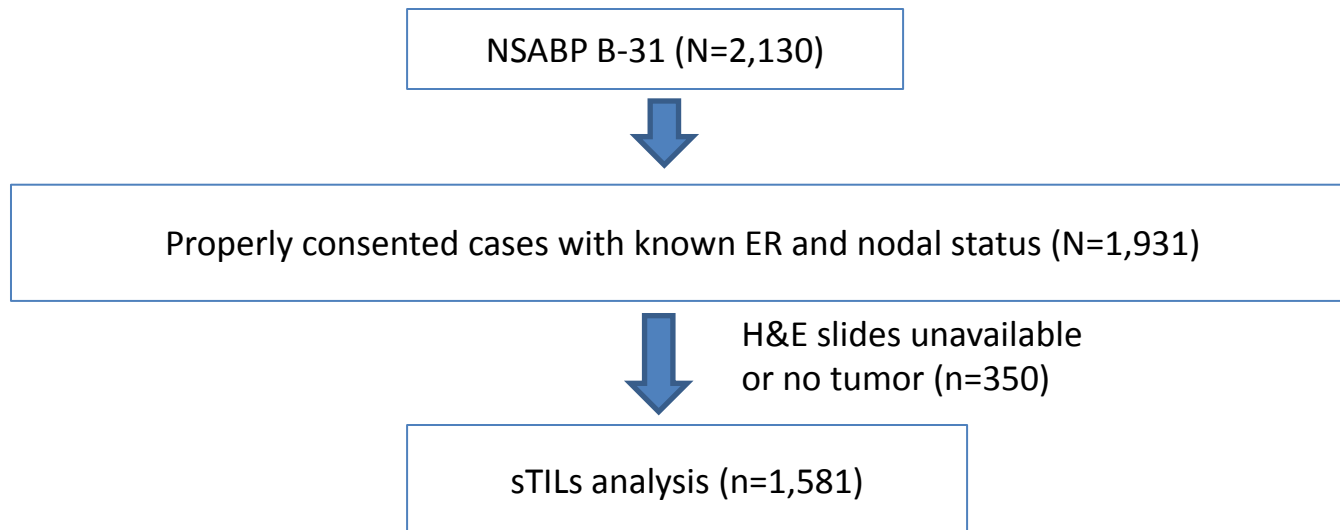

Supplement: djz032_supplementary_data.pdf [file djz032_supplementary_data.pdf]
